# Supplementary material for: Synthesis of microporous molecular sieves by surfactant decomposition
Source: Royal Society of Chemistry journal article supplement (doi:10.1039/b005770n), 2001-01-01
Supplement: b005770n.doc [file b005770n.doc]

Supplemental materials:

**s-Fig. 1.** IR spectra of CTAB (a) and its decomposition product (b).


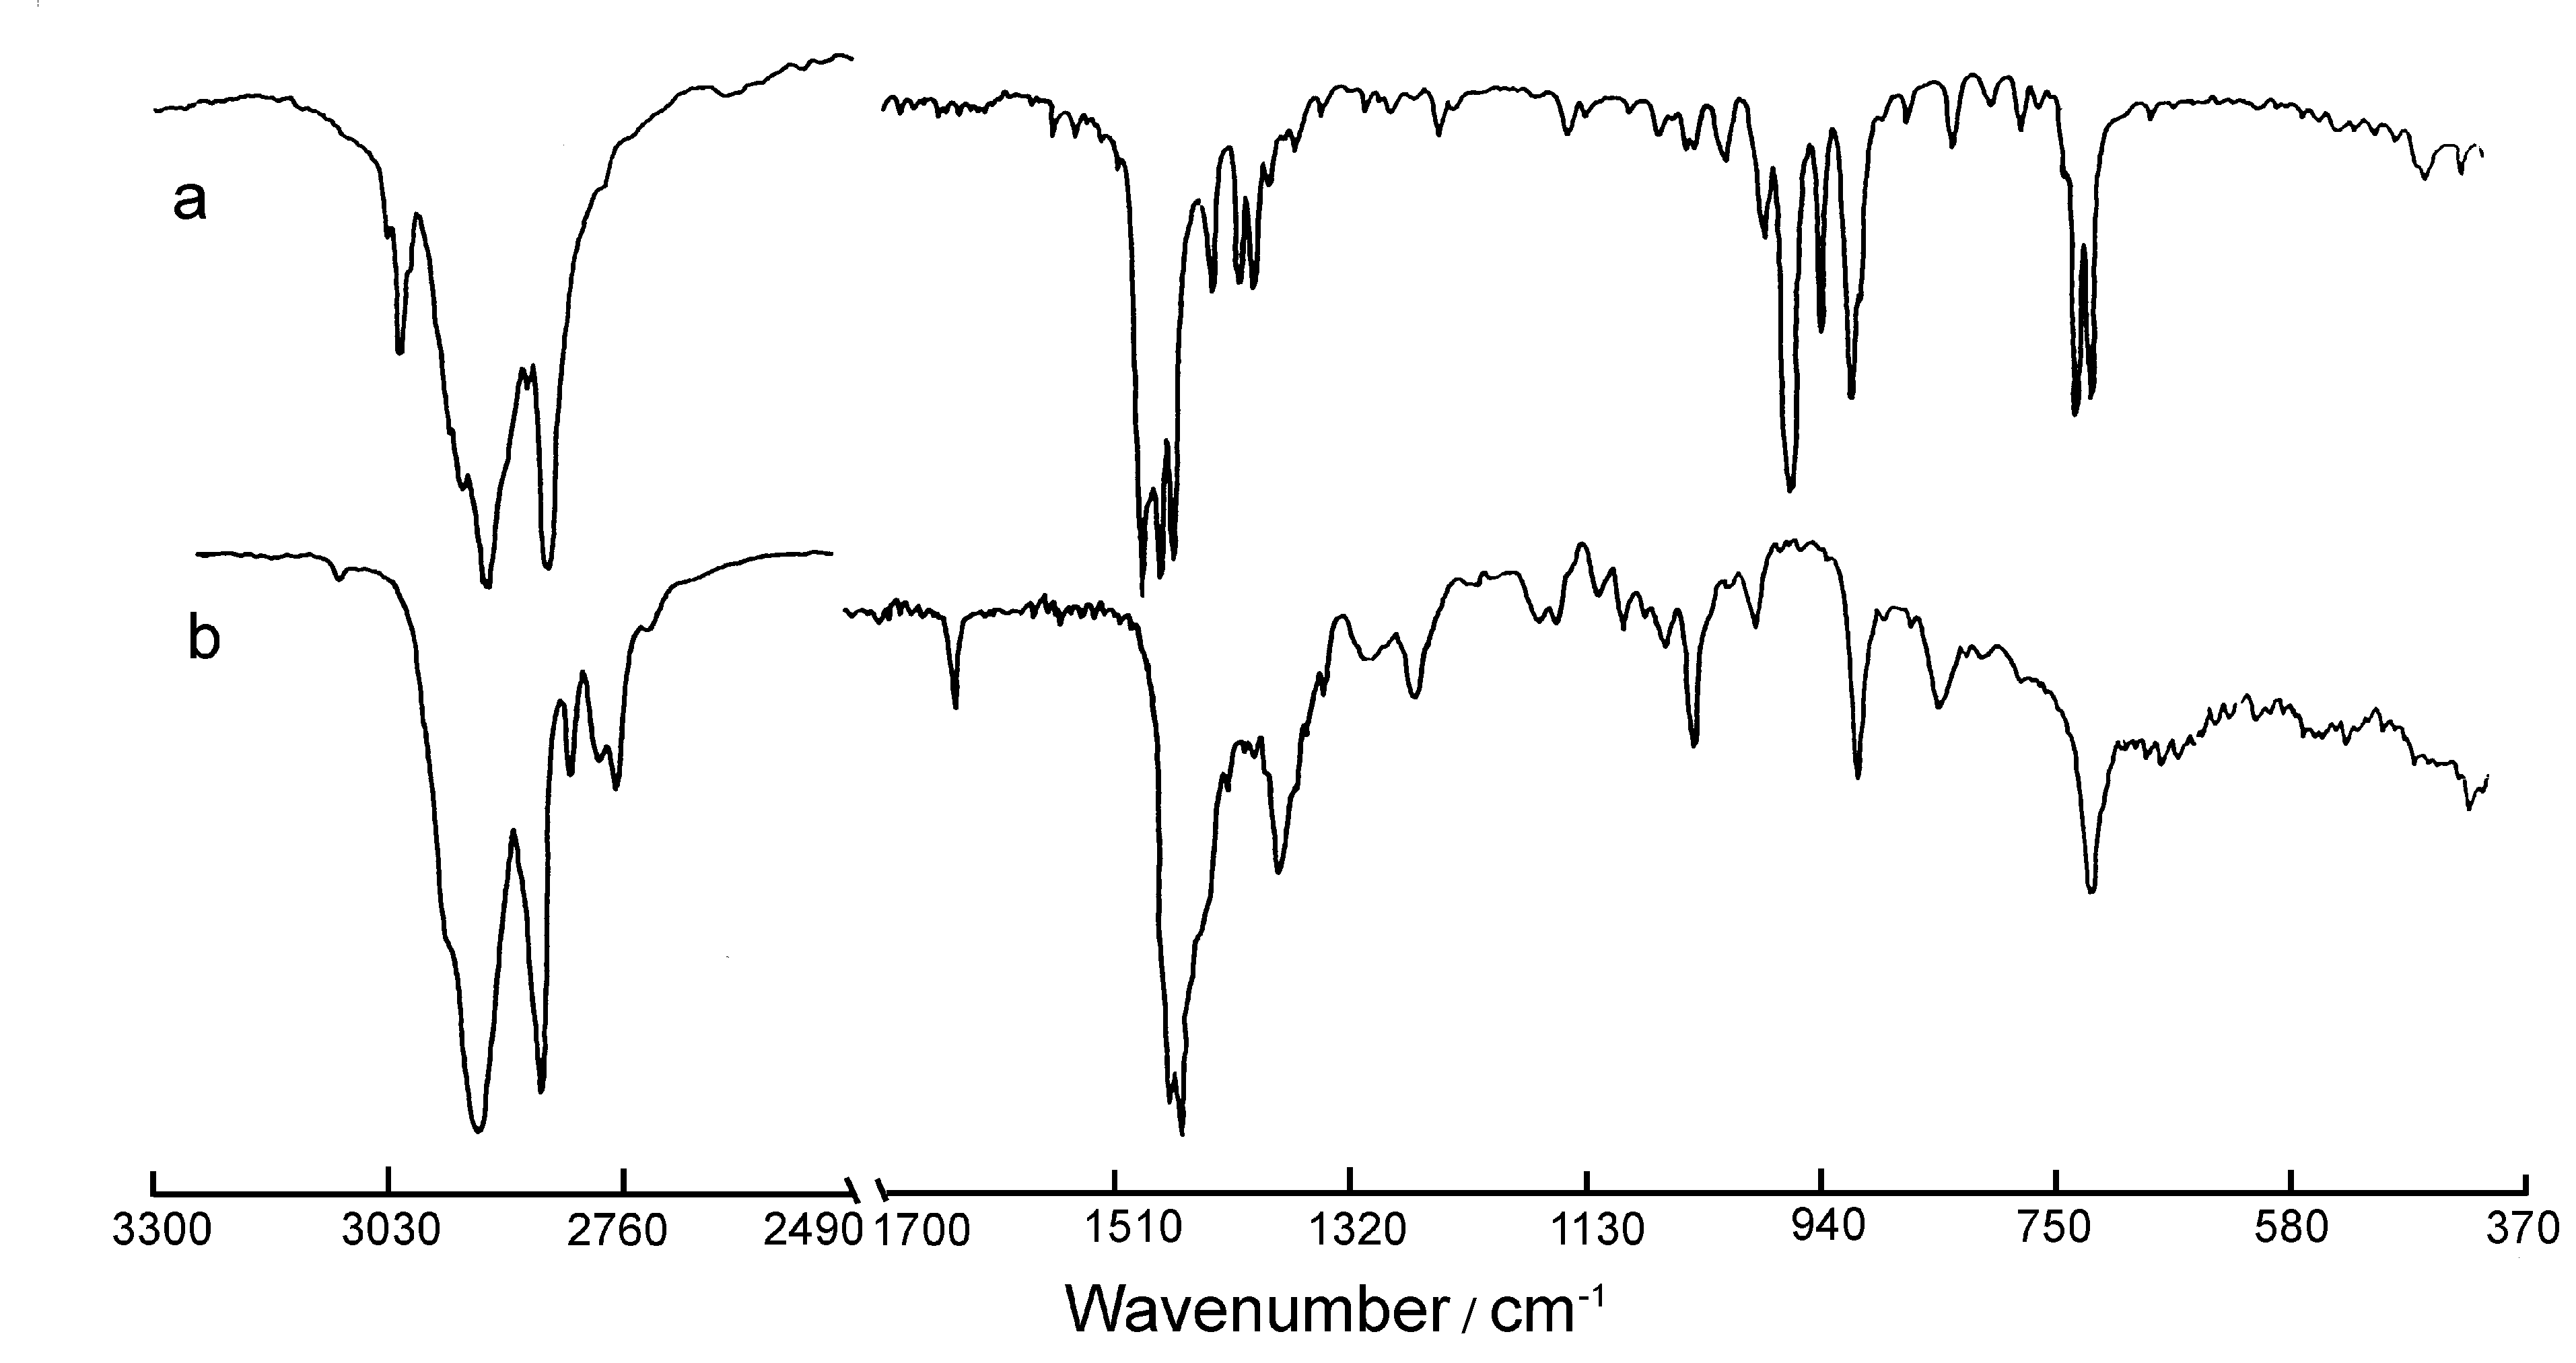


**s-Fig. 2.** Decomposition of CTAB in the presence of SiO- or OH- .

**C16= + H(CH3)3N SiO**

**CH4 + HC16(CH3)2N SiO**

**CH3**

**+**

**C16 N CH3**

**CH3**

**SiO-**

**(OH-)**

**s-Table 1**. Assignments of IR vibrational frequencies of CTAB and its decomposition products.

| Sample | Assignments of IR vibrational bands ( cm-1) |
| --- | --- |
| CTAB :    CH3 Br-  CH3-(CH2)15-N+-CH3  CH3 | -CH3 anti-symmetrical stretching 2959 anti-symmetrical deformation 1462  symmetrical stretching 2870 symmetrical deformation 1395  -(CH2)- anti-symmetrical stretching 2916 in-plane deformation 1462  symmetrical stretching 2848 torsional 1303  out-plane swinging 1300-1000  in-plane swinging 720,728  n>2, doublet  tertiary amine  RN(CH3)3+ 2500 (weak) , 961,908,1472 |
| Tertiary amine    CH3  CH3-(CH2)15-N-CH3    CH3  H3C N CH3 | -CH3 anti-symmetrical stretching 2954 anti-symmetrical deformation 1464  symmetrical stretching -- symmetrical deformation 1376  -CH3 (adjacent to N)  N-CH3 stretching 2812,  CH3 2761    -(CH2)- anti-symmetrical stretching 2924 in-plane deformation 1462  symmetrical stretching 2853 torsional 1303  out-plane swinging  1300-1000 (1041,1151,1265)  in-plane swinging 720    R2  C-N R1- N- R3  stretching 1040 |
| C16= | 841, 1638 |
